# Supplementary material for: Xanthones Isolated from Cratoxylum cochinchinensis Reduced Oxidative Stress in Periodontal Ligament Stem Cells
Source: MDPI journal article supplement (doi:10.3390/ijms241914675), 2023-09-28
Supplement: s1 [file s1]

**1,3,7-trihydroxyxanthone (1).** Yellow powder, mp = 318-319 °C. For  $^1\text{H}$  NMR (300 MHz,  $\text{CD}_3\text{OD} + \text{CDCl}_3$ ) spectroscopic data:  $\delta$  12.92 (s), 7.51 (d,  $J = 2.7$  Hz, H-8), 7.33 (d,  $J = 9.0$  Hz, H-5), 7.25 (dd,  $J = 9.0, 2.7$  Hz, H-6), 6.37 (d,  $J = 2.1$  Hz, H-4) and 6.25 (d,  $J = 2.1$  Hz, H-2).

**7-geranyloxy-1,3-dihydroxyxanthone (2).** Yellow powder, m.p. 138- 140 °C; UV-Vis  $\lambda_{\text{max}}$  (log  $\epsilon$ ) 206 (4.25), 236 (4.48), 260 (4.39), 316 (3.89), 364 (3.94) nm; FT-IR (KBr)  $\nu_{\text{max}}$  3162, 1652  $\text{cm}^{-1}$ . For  $^1\text{H}$  NMR (300 MHz,  $\text{CDCl}_3$ ) spectroscopic data:  $\delta$  12.85 (s), 7.86 (br s, 3-OH), 7.40 (br d,  $J = 1.5$  Hz, H-8), 7.18 (br d,  $J = 9.6$  Hz, H-6), 7.14 (br d,  $J = 9.0$  Hz, H-5), 6.27 (d,  $J = 1.8$  Hz, H-4), 6.22 (d,  $J = 1.8$  Hz, H-2), 5.39 (br t,  $J = 6.3$  Hz, H-2'), 4.99 (br t,  $J = 5.7$  Hz, H-6'), 4.45 (d,  $J = 6.3$  Hz, H-1'), 2.01 (*m*, H-4'), 1.95 (*m*, H-5'), 1.64 (*s*, H-9'), 1.57 (*s*, H-8') and 1.50 (*s*, H-10').

**3-oxygeranyl-1,7-dihydroxyxanthone (3).** Yellow powder, m.p. 147-148 °C; UV-Vis ( $\text{CHCl}_3$ )  $\lambda_{\text{max}}$  (log  $\epsilon$ ) 203 (4.49), 229 (4.30), 259 (4.31), 307 (3.99), 374 (3.63) nm; FT-IR (KBr)  $\nu_{\text{max}}$  3288, 1647  $\text{cm}^{-1}$ . For  $^1\text{H}$  (300 MHz,  $\text{CDCl}_3$ ) spectroscopic data:  $\delta$  12.73 (s), 7.40 (br s, H-8), 7.30 (br d,  $J = 9.3$  Hz, H-5), 7.26 (br d,  $J = 9.3$  Hz, H-6), 7.03 (br s, 7-OH), 6.40 (d,  $J = 2.4$  Hz, H-4), 6.34 (d,  $J = 2.4$  Hz, H-2), 5.50 (br t,  $J = 6.6$  Hz, H-2'), 5.11 (br t,  $J = 5.7$  Hz, H-6'), 4.63 (d,  $J = 6.6$  Hz, H-1'), 2.14 (*m*, H-4'), 2.10 (*m*, H-5'), 1.78 (*s*, H-9'), 1.69 (*s*, H-8') and 1.63 (*s*, H-10').
